# Supplementary material for: A single recall vaccination lapse in sows triggers PRRSV resurgence and boosts viral genetic diversity
Source: Springer Nature journal article supplement (doi:10.1186/s40813-025-00433-w), 2025-05-08

**Additional File 1. Pseudorabies-antibody levels of three-week-old piglets as determined by ELISA (S/P ratios).** Distribution of S/P ratios for the offspring of the fourteen sows present in batches 1 and 3. Each triangle represents an individual. S/P ratios  $\geq 0.4$  are considered positive. ns= non-significant.

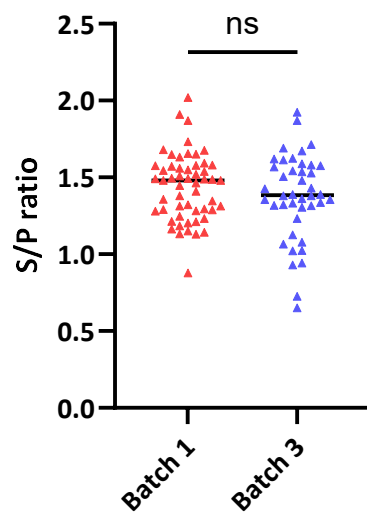

Supplement: MOESM1 [file 40813_2025_433_MOESM1_ESM.pdf]
